# Supplementary material for: Clinical assessment and train-of-four measurements in critically ill patients treated with recommended doses of cisatracurium or atracurium for neuromuscular blockade: a prospective descriptive study
Source: PubMed Central journal article supplement (PMC5247382; doi:10.1186/s13613-017-0234-0), 2017-01-19
Supplement: 13613_2017_234_MOESM1_ESM.pdf [file 13613_2017_234_MOESM1_ESM.pdf]

**Additional file 1: Table S1.**

Table S1: Comparison of results obtained by the train of four and the clinical assessment of neuromuscular blockade recorded over the entire study period.

|                                         | TOF measurements |                         | Clinical assessments    |
|-----------------------------------------|------------------|-------------------------|-------------------------|
|                                         | Facial           | Ulnar                   |                         |
| Whole population                        | n = 996          | n = 996                 | n = 996                 |
| - over-paralyzed<br>(TOF = 0), n (%)    | 412 (41.4)       | 653 (65.6) <sup>a</sup> | 27 (2.7) <sup>b,c</sup> |
| - well-paralyzed<br>(TOF = 1-2), n (%)  | 88 (8.8)         | 114 (11.4)              | 859 (86.2)              |
| - under-paralyzed<br>(TOF = 3-4), n (%) | 496 (49.8)       | 229 (23)                | 110 (11.1)              |
| Center 1 (Cisatracurium use)            | n = 846          | n = 846                 | n = 846                 |
| - over-paralyzed<br>(TOF = 0), n (%)    | 359 (42.4)       | 545 (64.5) <sup>a</sup> | 14 (1.7) <sup>b,c</sup> |
| - well-paralyzed<br>(TOF = 1-2), n (%)  | 78 (9.2)         | 101 (11.9)              | 748 (88.4)              |
| - under-paralyzed<br>(TOF = 3-4), n (%) | 409 (48.4)       | 200 (23.6)              | 84 (9.9)                |
| Center 2 (Atracurium use)               | n = 150          | n = 150                 | n = 150                 |
| - over-paralyzed<br>(TOF = 0), n (%)    | 53 (33.5)        | 108 (72) <sup>a</sup>   | 13 (8.6) <sup>b,c</sup> |
| - well-paralyzed<br>(TOF = 1-2), n (%)  | 10 (6.6)         | 13 (8.6)                | 111 (74)                |
| - under-paralyzed<br>(TOF = 3-4), n (%) | 87(58)           | 29 (19.4)               | 26 (17.4)               |

Variables are reported as numbers and percentages.

TOF: Train Of Four.

<sup>a</sup> facial TOF vs. ulnar TOF,  $p < 0.0001$ .

<sup>b</sup> facial TOF vs. clinical assessment,  $p < 0.0001$ .

<sup>c</sup> ulnar TOF vs. clinical assessment,  $p < 0.0001$ .
