# Supplementary material for: Clinical assessment and train-of-four measurements in critically ill patients treated with recommended doses of cisatracurium or atracurium for neuromuscular blockade: a prospective descriptive study
Source: PubMed Central journal article supplement (PMC5247382; doi:10.1186/s13613-017-0234-0), 2017-01-19
Supplement: 13613_2017_234_MOESM2_ESM.pdf [file 13613_2017_234_MOESM2_ESM.pdf]

**Additional file 2: Results for agreements between clinical assessment of neuromuscular blockade with train of four (TOF) on the facial and ulnar nerves on whole population, in center 1 and in center 2.**

Table S2a: Comparison on whole population of the train of four (TOF) on the facial nerve and the clinical assessment of neuromuscular blockade.

|                  | Clinical<br>assessment<br>« over-<br>paralyzed » | Clinical<br>assessment<br>« well-<br>paralyzed » | Clinical<br>assessment<br>« under-<br>paralyzed » | Total |
|------------------|--------------------------------------------------|--------------------------------------------------|---------------------------------------------------|-------|
| Facial TOF = 0   | 15                                               | 382                                              | 15                                                | 412   |
| Facial TOF = 1-2 | 1                                                | 84                                               | 3                                                 | 88    |
| Facial TOF = 3-4 | 11                                               | 394                                              | 91                                                | 496   |
| Total            | 27                                               | 860                                              | 109                                               | 996   |

The agreement was very poor between the facial TOF and the clinical assessment (kappa: 0.06; weighted kappa: 0.09).

Table S2b: Comparison in center 1 (Cisatracurium use) patients of the train of four (TOF) on the facial nerve and the clinical assessment of neuromuscular blockade.

|                  | Clinical<br>assessment<br>« over-<br>paralyzed » | Clinical<br>assessment<br>« well-<br>paralyzed » | Clinical<br>assessment<br>« under-<br>paralyzed » | Total |
|------------------|--------------------------------------------------|--------------------------------------------------|---------------------------------------------------|-------|
| Facial TOF = 0   | 9                                                | 342                                              | 10                                                | 361   |
| Facial TOF = 1-2 | 1                                                | 74                                               | 1                                                 | 76    |

|                  |    |     |    |     |
|------------------|----|-----|----|-----|
| Facial TOF = 3-4 | 4  | 333 | 72 | 412 |
| Total            | 14 | 749 | 83 | 846 |

The agreement was very poor between the facial TOF and the clinical assessment (kappa: 0.057; weighted kappa: 0.09).

Table S2c: Comparison in center 2 (atracurium use) patients of the train of four (TOF) on the facial nerve and the clinical assessment of neuromuscular blockade.

|                  | Clinical<br>assessment<br>« over-<br>paralyzed » | Clinical<br>assessment<br>« well-<br>paralyzed » | Clinical<br>assessment<br>« under-<br>paralyzed » | Total |
|------------------|--------------------------------------------------|--------------------------------------------------|---------------------------------------------------|-------|
| Facial TOF = 0   | 6                                                | 40                                               | 5                                                 | 51    |
| Facial TOF = 1-2 | 0                                                | 10                                               | 2                                                 | 12    |
| Facial TOF = 3-4 | 7                                                | 61                                               | 91                                                | 19    |
| Total            | 13                                               | 111                                              | 26                                                | 150   |

The agreement was very poor between the facial TOF and the clinical assessment (kappa: 0.054; weighted kappa: 0.08).

Table S2d: Comparison on whole population of the train of four (TOF) on the ulnar nerve and the clinical assessment of neuromuscular blockade.

|                 | Clinical<br>assessment<br>« over-<br>paralyzed » | Clinical<br>assessment<br>« well-<br>paralyzed » | Clinical<br>assessment<br>« under-<br>paralyzed » | Total |
|-----------------|--------------------------------------------------|--------------------------------------------------|---------------------------------------------------|-------|
| Ulnar TOF = 0   | 22                                               | 594                                              | 37                                                | 653   |
| Ulnar TOF = 1-2 | 1                                                | 96                                               | 17                                                | 114   |
| Ulnar TOF = 3-4 | 4                                                | 170                                              | 55                                                | 229   |
| Total           | 27                                               | 860                                              | 109                                               | 996   |

The agreement was very poor between the facial TOF and the clinical assessment (kappa: 0.04; weighted kappa: 0.07).

Table S2e: Comparison in center 1 (Cisatracurium use) patients of the train of four (TOF) on the ulnar nerve and the clinical assessment of neuromuscular blockade.

|                 | Clinical<br>assessment<br>« over-<br>paralyzed » | Clinical<br>assessment<br>« well-<br>paralyzed » | Clinical<br>assessment<br>« under-<br>paralyzed » | Total |
|-----------------|--------------------------------------------------|--------------------------------------------------|---------------------------------------------------|-------|
| Ulnar TOF = 0   | 8                                                | 535                                              | 21                                                | 564   |
| Ulnar TOF = 1-2 | 0                                                | 88                                               | 13                                                | 101   |
| Ulnar TOF = 3-4 | 1                                                | 140                                              | 40                                                | 184   |
| Total           | 9                                                | 763                                              | 74                                                | 846   |

The agreement was very poor between the facial TOF and the clinical assessment (kappa: 0.031; weighted kappa: 0.067).

Table S2f: Comparison in center 2 (atracurium use) patients of the train of four (TOF) on the ulnar nerve and the clinical assessment of neuromuscular blockade.

|                  | Clinical<br>assessment<br>« over-<br>paralyzed » | Clinical<br>assessment<br>« well-<br>paralyzed » | Clinical<br>assessment<br>« under-<br>paralyzed » | Total |
|------------------|--------------------------------------------------|--------------------------------------------------|---------------------------------------------------|-------|
| Facial TOF = 0   | 14                                               | 59                                               | 16                                                | 89    |
| Facial TOF = 1-2 | 1                                                | 8                                                | 4                                                 | 13    |
| Facial TOF = 3-4 | 3                                                | 30                                               | 15                                                | 48    |
| Total            | 18                                               | 97                                               | 35                                                | 150   |

The agreement was very poor between the facial TOF and the clinical assessment (kappa: 0.056; weighted kappa: 0.097).

Table S2g: Comparison on whole population of the train of four (TOF) recorded on the facial and ulnar nerves.

|                 | Facial TOF = 0 | Facial TOF = 1-2 | Facial TOF = 3-4 | Total |
|-----------------|----------------|------------------|------------------|-------|
| Ulnar TOF = 0   | 399            | 68               | 186              | 653   |
| Ulnar TOF = 1-2 | 8              | 11               | 95               | 114   |
| Ulnar TOF = 3-4 | 5              | 9                | 215              | 229   |
| Total           | 412            | 88               | 496              | 996   |

The agreement was very moderate between the ulnar and facial TOF (kappa: 0.38; weighted kappa: 0.45).

Table S2h: Comparison in center 1 (Cisatracurium use) patients of the train of four (TOF) recorded on the facial and ulnar nerves.

|                 | Facial TOF = 0 | Facial TOF = 1-2 | Facial TOF = 3-4 | Total |
|-----------------|----------------|------------------|------------------|-------|
| Ulnar TOF = 0   | 351            | 59               | 139              | 548   |
| Ulnar TOF = 1-2 | 7              | 8                | 82               | 97    |
| Ulnar TOF = 3-4 | 4              | 9                | 188              | 201   |
| Total           | 362            | 76               | 411              | 846   |

The agreement was very moderate between the ulnar and facial TOF (kappa: 0.41; weighted kappa: 0.48).

Table S2i: Comparison in center 2 (atracurium use) patients of the train of four (TOF) recorded on the facial and ulnar nerves.

|                  | Facial TOF = 0 | Facial TOF = 1-2 | Facial TOF = 3-4 | Total |
|------------------|----------------|------------------|------------------|-------|
| Ulnar l TOF = 0  | 48             | 9                | 48               | 105   |
| Ulnar TOF = 1-2  | 1              | 3                | 13               | 17    |
| Facial TOF = 3-4 | 1              | 0                | 27               | 28    |
| Total            | 50             | 12               | 88               | 150   |
