# Supplementary material for: Clinical assessment and train-of-four measurements in critically ill patients treated with recommended doses of cisatracurium or atracurium for neuromuscular blockade: a prospective descriptive study
Source: PubMed Central journal article supplement (PMC5247382; doi:10.1186/s13613-017-0234-0), 2017-01-19
Supplement: 13613_2017_234_MOESM3_ESM.pdf [file 13613_2017_234_MOESM3_ESM.pdf]

### Additional file 3: Table S3

Table S2: Clinical, facial and ulnar train of four (TOF) measurements recorded on the first 4 days of mechanical ventilation (MV) from the diagnosis of acute respiratory distress syndrome. .

| Day of MV                      | Whole population |          |         |         | P value | Center 1 (Cisatracurium use) |          |         |         | P value | Center 2 (Atracurium use) |         |         |         | P value |
|--------------------------------|------------------|----------|---------|---------|---------|------------------------------|----------|---------|---------|---------|---------------------------|---------|---------|---------|---------|
|                                | 0                | 1        | 2       | 3       |         | 0                            | 1        | 2       | 3       |         | 0                         | 1       | 2       | 3       |         |
| Measurements, n                | 118              | 153      | 103     | 87      |         | 98                           | 127      | 87      | 72      |         | 20                        | 26      | 16      | 15      |         |
| Clinical assessments, n (%)    |                  |          |         |         |         |                              |          |         |         |         |                           |         |         |         |         |
| Over paralyzed                 | 5 (3)            | 7 (5)    | 4 (4)   | 2 (3)   | 0.33    | 4 (4)                        | 3 (2)    | 3 (3)   | 1 (1)   | 0.41    | 1 (10)                    | 4 (19)  | 1 (7)   | 1 (13)  | 0.88    |
| Well paralyzed                 | 109 (93)         | 130 (85) | 89 (86) | 78 (89) | 0.81    | 91 (92)                      | 114 (91) | 78 (90) | 67 (94) | 0.92    | 18 (90)                   | 16 (61) | 11 (68) | 11 (67) | 0.31    |
| Under paralyzed                | 4 (4)            | 16 (14)  | 10 (10) | 7 (8)   | 0.67    | 3 (3)                        | 9 (7)    | 6 (7)   | 4 (5)   | 0.49    | 1 (10)                    | 5 (20)  | 4 (25)  | 3 (20)  | 0.19    |
| Facial TOF measurements, n (%) |                  |          |         |         |         |                              |          |         |         |         |                           |         |         |         |         |
| Over paralyzed<br>(TOF= 0)     | 84 (71)          | 94 (61)  | 58 (56) | 46 (53) | 0.005   | 75 (77)                      | 84 (66)  | 54 (62) | 41 (57) | 0.006   | 9 (45)                    | 10 (38) | 4 (25)  | 5 (33)  | 0.30    |
| Well paralyzed<br>(TOF= 1-2)   | 6 (5)            | 21 (14)  | 8 (8)   | 6 (7)   | 0.99    | 3 (3)                        | 18 (14)  | 6 (7)   | 6 (8)   | 0.54    | 3 (5)                     | 3 (12)  | 2 (13)  | 0       | 0.19    |

|                               |         |          |         |         |        |         |          |         |         |       |         |         |         |         |      |
|-------------------------------|---------|----------|---------|---------|--------|---------|----------|---------|---------|-------|---------|---------|---------|---------|------|
| Under paralyzed<br>(TOF= 3-4) | 28 (24) | 38 (25)  | 37 (36) | 35 (40) | 0.01   | 20 (20) | 25 (20)  | 27 (31) | 25 (35) | 0.009 | 8 (40)  | 13 (50) | 10 (62) | 10 (67) | 0.08 |
| Ulnar TOF measurements, n (%) |         |          |         |         |        |         |          |         |         |       |         |         |         |         |      |
| Over paralyzed<br>(TOF= 0)    | 96 (81) | 126 (82) | 79 (77) | 63 (72) | 0.07   | 79 (80) | 104 (82) | 68 (78) | 52 (72) | 0.19  | 17 (85) | 22 (85) | 11 (69) | 11 (73) | 0.22 |
| Well paralyzed<br>(TOF= 1-2)  | 13 (11) | 19 (12)  | 13 (13) | 10 (11) | 0.88   | 11 (11) | 17 (13)  | 9 (10)  | 8 (11)  | 0.82  | 2 (10)  | 2 (8)   | 4 (25)  | 2 (13)  | 0.40 |
| Under paralyzed<br>(TOF= 3-4) | 9 (8)   | 8 (6)    | 11 (10) | 14 (17) | <0.001 | 8 (9)   | 6 (5)    | 8 (12)  | 12 (16) | 0.04  | 1 (5)   | 2 (7)   | 1 (6)   | 2 (13)  | 0.43 |

---
