# Supplementary material for: Clinical assessment and train-of-four measurements in critically ill patients treated with recommended doses of cisatracurium or atracurium for neuromuscular blockade: a prospective descriptive study
Source: PubMed Central journal article supplement (PMC5247382; doi:10.1186/s13613-017-0234-0), 2017-01-19
Supplement: 13613_2017_234_MOESM4_ESM.pdf [file 13613_2017_234_MOESM4_ESM.pdf]

#### Additional File 4

Table S4: Factors associated with the diagnosis of intensive care unit-acquired weakness (ICU-AW) seven days after awakening the patient.

|                                                                        | ICU-AW = YES     | ICU-AW = NO      | p    |
|------------------------------------------------------------------------|------------------|------------------|------|
|                                                                        | n = 14           | n = 33           |      |
| Age, years                                                             | 67 (50-73)       | 59 (48-67)       | 0.33 |
| Male, n (%)                                                            | 9 (64)           | 22 (67)          | 0.99 |
| Body mass index, kg/m <sup>2</sup>                                     | 26.1 (23.3-28.5) | 25.9 (23.1-31.3) | 0.66 |
| SAPS II, points                                                        | 51 (48-69)       | 46 (34-55)       | 0.07 |
| SOFA, points                                                           | 9 (6-12)         | 8 (6-11)         | 0.56 |
| Sepsis at inclusion, n (%)                                             | 9 (64)           | 21 (64)          | 0.99 |
| Duration of sedation, hours                                            | 266 (161-391)    | 204 (104-324)    | 0.30 |
| Total dose of midazolam, mg                                            | 1440 (628-2262)  | 872 (554-1683)   | 0.40 |
| Total dose of morphinic, mg                                            | 1425 (576-2974)  | 1251 (591-1977)  | 0.69 |
| Duration of catecholamines, days                                       | 6 (3-9)          | 4 (3-7)          | 0.29 |
| Total dose of corticosteroids administered concomitantly to NMBAs , mg | 1350 (750-2825)  | 700 (228-1250)   | 0.08 |
| Mean glycaemia, mmol/l                                                 | 8.3 (7.8-9.1)    | 8 (7.6-8.8)      | 0.46 |
| Duration of insulin, days                                              | 13 (7-19)        | 8 (3-15)         | 0.12 |
| Total dose of insulin, UI                                              | 350 (180-792)    | 151 (55-419)     | 0.11 |
| Use of renal replacement therapy                                       | 7 (50)           | 6 (18)           | 0.06 |

Continuous variables are reported as medians and interquartile ranges (25th-75th percentiles), and categorical variables as numbers and percentages.

ICU-AW: intensive care unit-acquired weakness; SAPS II: Simplified Acute Physiologic Score II; SOFA: Sequential Organ Failure Assessment; NMBA: Neuromuscular blocking agents.
